# Supplementary material for: Exogenous Promoter Triggers APETALA3 Silencing through RNA-Directed DNA Methylation Pathway in Arabidopsis
Source: MDPI journal article supplement (doi:10.3390/ijms20184478), 2019-09-11
Supplement: s1 [file s1]

**Supplementary table 1 The primers used for quantitative PCR**

| <b>Name</b>      | <b>Sequence</b>             |
|------------------|-----------------------------|
| AP3-L1-qRT       | CGAGACCACCAAGAAAAAGAACAA    |
| AP3-R1-qRT       | GGTGGAAACGAAGAGCGTAAGC      |
| SEP3-L-qRT       | ATGCTTCGGACACTGGAGAGGTA     |
| SEP3-R-qRT       | GCTTGAGATACTCCTGCTGGCTAC    |
| SEP2-L-qRT       | TGGACATCCTCAGGCTCATTCTC     |
| SEP2-R-qRT       | ATGTAGCCGTTTCCTTGTTGGG      |
| SEP1-L-qRT       | GATGGGAAGGTGGTGAACAGAATG    |
| SEP1-R-qRT       | GCTTGGGTTGTGCGCAGTTATTTG    |
| AG-L-qRT         | CCACCTCAAACGCAATCTCAACC     |
| AG-R-qRT         | CACTAACTGGAGAGCGGTTTGGTC    |
| PI-L-qRT         | ACTTGAAAAATCTGATGGCTGTCG    |
| PI-R-qRT         | GCTGGAAAGTGAGTTGCCGTTG      |
| AP2-L-qRT        | ATCAAATGTAACGGCAAAGACGC     |
| AP2-R-qRT        | TGGTTCATCCTGAGCCGCATA       |
| AP1-L-qRT        | CAGCACCAAATCCAGCATCCTTAC    |
| AP1-R-qRT        | AGCAGCCAAGGTTGCAGTTGTAAA    |
| SPL-L-qRT        | ACTCGGGAGCAACAGGATCTATTG    |
| SPL-R-qRT        | CACAGCGATTATTGGAAGAAGCG     |
| AT3G54280-L-qPCR | AAAGGAATGAAGGCAATTCTAGGAAAC |
| AT3G54280-R-qPCR | CCACTACAAAACTACTTCGGCGG     |
| AT3G54290-L-qPCR | CGACGAAGCGACTCCATTGATAG     |
| AT3G54290-R-qPCR | TCCTCCGACCATCTCAACATCCT     |
| AT3G54300-L-qPCR | TTGACAAAACCGAGAACCTACAGT    |
| AT3G54300-R-qPCR | GCAACAACCCAAACGATGAGAAT     |
| AT3G54310-L-qPCR | ATTGTTTGTGGTGTGTTGGCATACTG  |
| AT3G54310-R-qPCR | AACACATTTCTCTCCACATCTTCC    |
| AT3G54320-L-qPCR | GATACAGGGTTTTCTCCGTTTTTG    |
| AT3G54320-R-qPCR | ATCCAGATTTTCCAAGTTCAAGCA    |
| AT3G54350-L-qPCR | ATACGGCTGGGTGATGACGGT       |
| AT3G54350-R-qPCR | AAAGGCATTCCCCGTATCTCAAC     |
| AT3G54360-L-qPCR | TTGGTGACTGTAGCCGAGCGAT      |
| AT3G54360-R-qPCR | ATCTCCAAATCATTCAACGGCAG     |
| AT3G54366-L-qPCR | TTCAACAATACGGATCTAGGGCG     |
| AT3G54366-R-qPCR | AAAACCTTGGGATACTTTGGATGG    |
| AT3G54380-L-qPCR | AGAACAGCTTCTGAGGCGACATAC    |
| AT3G54380-R-qPCR | AGATAACCGCAAGAGAGGATAGGG    |
| AT3G54390-L-qPCR | GGTGGTTAGCGGAGGTGGTGAT      |
| AT3G54390-L-qPCR | TATCTCCGTCCGTTTCAAATCCA     |
| AT3G54400-L-qPCR | ACTTGGTTGGGATTTCGTGTCGG     |
| AT3G54400-L-qPCR | AGCCTTGTGTAGACCGTCCCCG      |

**Primers used for bisulfite sequencing.**

|         |                            |
|---------|----------------------------|
| Me-L462 | TTTTGTTTAYTTTAGGGTAAGTGTA  |
| Me-R695 | ATTACAARACACTRTTTAAATCAAC  |
| PI-L558 | TTGAAGAAAAYATAGTAYGGAAGAG  |
| PI-R790 | TCRCTTATTACACATARCCAACCTCT |

**The primers used for transgenic line analysis**

|       |                         |
|-------|-------------------------|
| KLB1  | GCTCTGATGCCGCCGTGTTCC   |
| KLB2  | CGGCGGCTGCATACGCTTGAT   |
| KLB3  | GCTGACCGCTTCCTCGTGCTTT  |
| M17-L | GCTTACAACCTCTTCTGCCTCTA |
| M17-R | ATTGCCATTGCCCACTCTTT    |

Bisulfite sequencing of AP3 promoter  
Bisulfite sequencing of AP3 promoter  
Bisulfite sequencing of PI promoter  
Bisulfite sequencing of PI promoter
