# Supplementary material for: Exogenous Promoter Triggers APETALA3 Silencing through RNA-Directed DNA Methylation Pathway in Arabidopsis
Source: MDPI journal article supplement (doi:10.3390/ijms20184478), 2019-09-11
Supplement: s1 [file s1]

**Supplementary table 2 Segregation analysis of fertility in the BC1F1 progenies**

| plants | sterile | fertile | $\chi^2$     |
|--------|---------|---------|--------------|
| M17    | 31      | 35      | 0.24(P>0.05) |
| M43    | 53      | 57      | 0.15(P>0.05) |
