# Supplementary material for: Exogenous Promoter Triggers APETALA3 Silencing through RNA-Directed DNA Methylation Pathway in Arabidopsis
Source: MDPI journal article supplement (doi:10.3390/ijms20184478), 2019-09-11
Supplement: s1 [file s1]

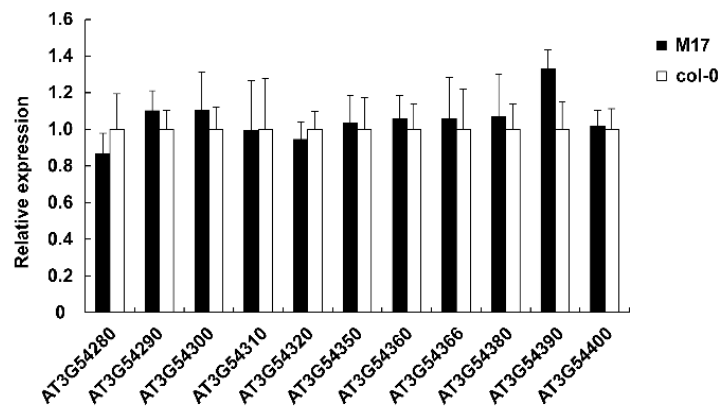

**Supplementary Figure S1.** The expression levels of these genes between col-0 and M17 flowers.

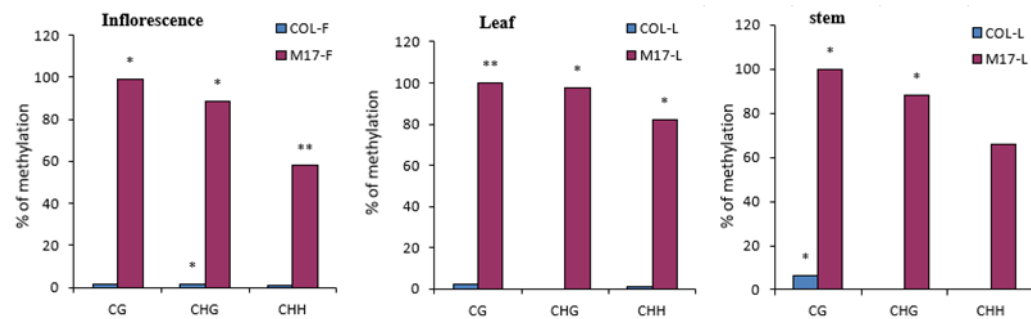

**Supplementary Figure S2.** DNA methylation analysis using leaves, stems and inflorescences. T test analysis of methylation differences in the group.

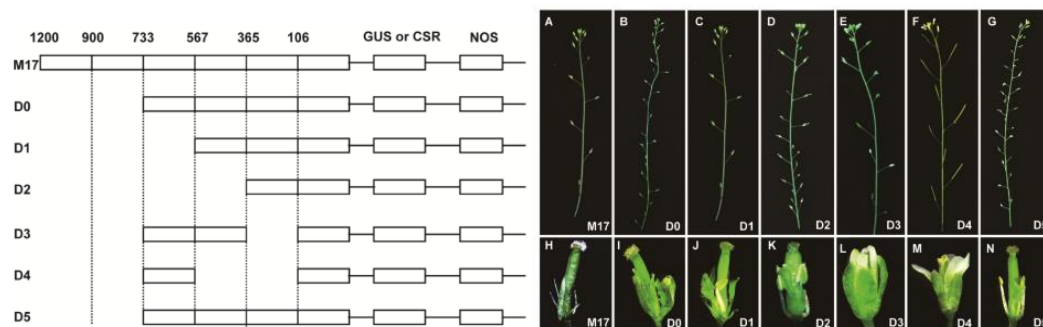

**Supplementary Figure S3.** *AP3* promoter truncation experimental vector schematic and transgenic phenotype.

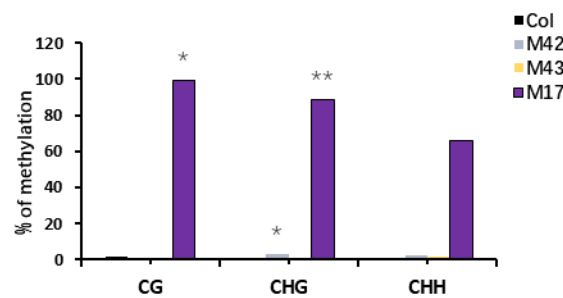

**Supplementary Figure S4.** *AP3* promoter DNA methylation analysis M17, M42, M43, Col-0. T test analysis of methylation differences in the group

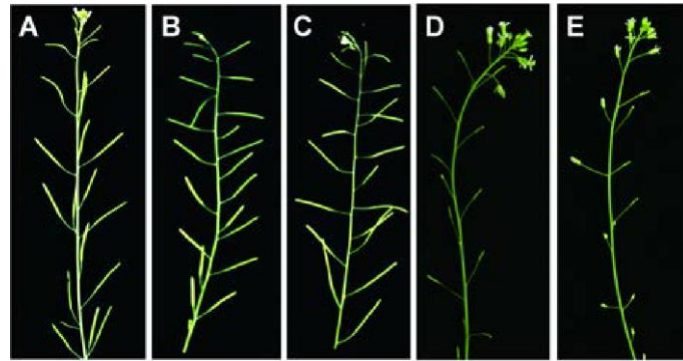

**Supplementary Figure S5.** Other transgenic phenotypes of the *ap3*-like phenotype. (A): 35SCSR; (B): ECSR; (C): ACSR; (D): PCP; (E): PCSR.
