# Supplementary material for: Exogenous Promoter Triggers APETALA3 Silencing through RNA-Directed DNA Methylation Pathway in Arabidopsis
Source: Int J Mol Sci. 2019 Sep 11;20(18):4478. doi: 10.3390/ijms20184478 (PMC6770043; doi:10.3390/ijms20184478)
Supplement: Supplementary file 1 [file ijms-20-04478-s001.zip]

Archive with 4 entries (3 files):
- ijms-573278 Suppl for final/
- ijms-573278 Suppl for final/ijms-573278-supplementary Figure for final.pdf
- ijms-573278 Suppl for final/ijms-573278-Supplementary table 1 The primers used for quantitative PCR.pdf
- ijms-573278 Suppl for final/ijms-573278-Supplementary table 2 Segregation analysis of fertility in the BC1F1 progenies.pdf
